# Supplementary material
Source: publisher site journal article supplement (https://www.dovepress.com/article/403232)
Supplement: Supplementary file 1 [file get_supplementary_file.php]

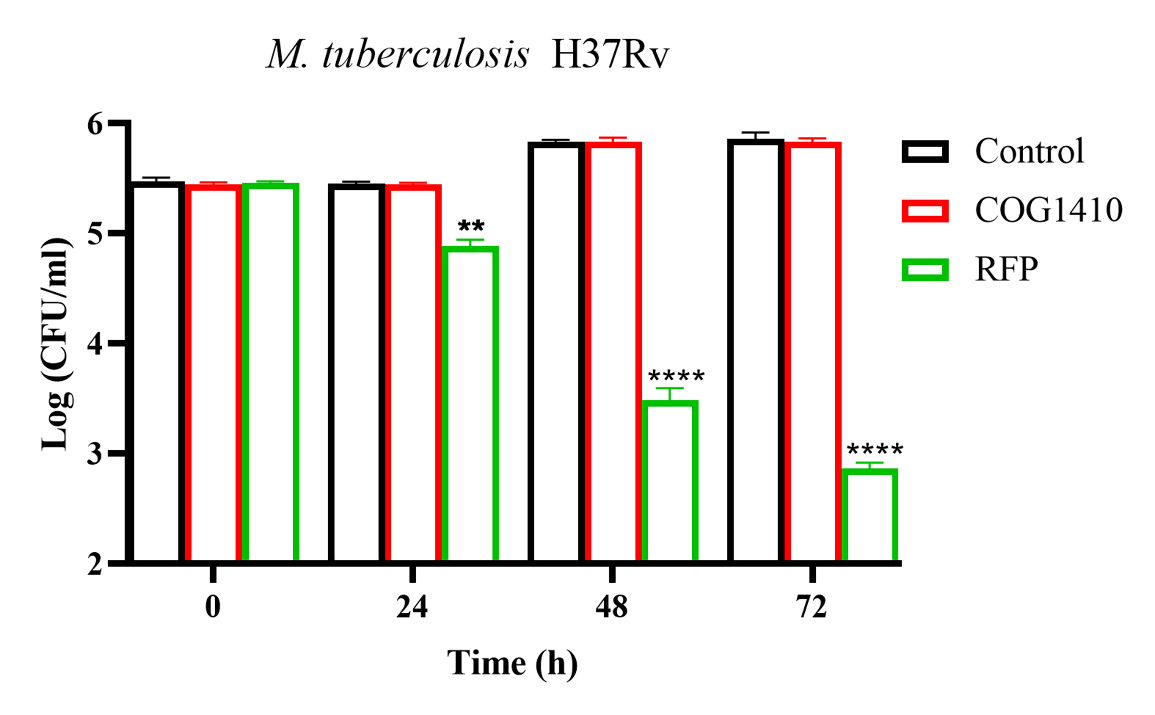


**Fig. S1. Time-kill assay of COG1410 against *M. tuberculosis* H37Rv.** The antimicrobial activity of COG1410 (16 μg/ml) and Rifampicin (RFP, 0.25 μg/ml) were determined at different time points.

**Table S1. Minimal inhibitory concentrations of COG1410 against *M. tuberculosis* and some NTM strains.**

| Strains | MIC (μg/ml) |
| --- | --- |
| *M. tuberculosis* H37Rv | >128 |
| MDR *M. tuberculosis* 8-57 | >128 |
| *M. abscess* 19977 | >128 |
| MDR *M. abscess* 9-56 | >128 |
| *MDR M. intracellular* 8-70 | >128 |
| *MDR M. avium* 8-18 | >128 |

**Table S2. Antimicrobial activity of combination of COG1410 with antibiotics against *M. tuberculosis* H37Rvand MDR *M. abscess* 9-56*.***

| Drug combination | Strains | MIC (μg/mL) | | FIC | FICI |
| --- | --- | --- | --- | --- | --- |
| Alone | Combined |
| Rifampicin | H37Rv | 0.25 | 0.25 | 1 | 2 |
| COG1410 | >128 | >128 | 1 |
| Ethambutol | H37Rv | 0.5 | 0.5 | 1 | 2 |
| COG1410 | >128 | >128 | 1 |
| Isoniazid | H37Rv | 0.25 | 0.25 | 1 | 2 |
| COG1410 | >128 | >128 | 1 |
| Amikacin | H37Rv | 1 | 0.5 | 1 | 2 |
| COG1410 | >128 | >128 | 1 |
| Kanamycin | MAB 9-56 | 8 | 8 | 1 | 2 |
| COG1410 | >128 | >128 | 1 |
| Cefoxitin | MAB 9-56 | 32 | 32 | 1 | 2 |
| COG1410 | >128 | >128 | 1 |
| Linezolid | MAB 9-56 | 16 | 16 | 1 | 2 |
| COG1410 | >128 | >128 | 1 |
